# Supplementary material for: A Randomized Phase II Trial of Adjuvant Galinpepimut-S, WT-1 Analogue Peptide Vaccine, After Multimodality Therapy for Patients with Malignant Pleural Mesothelioma
Source: Oxford University Press journal article supplement (doi:10.1158/1078-0432.ccr-17-2169), 2017-10-02
Supplement: 10780432ccr172169-sup-186963_2_supp_4272425_hwbvm2.docx [file 10780432ccr172169-sup-186963_2_supp_4272425_hwbvm2.docx]

**Supplementary Table 2**

| **Author** | **Year** | **Number of patients** | **Median time to recurrence following surgery (months)** |
| --- | --- | --- | --- |
| Weder[18](#_ENREF_18" \o "Weder, 2004 #1) | 2004 | 19 | 16.5 |
| Rea[19](#_ENREF_19) | 2007 | 21 | 16.3 |
| Weder[20](#_ENREF_20" \o "Weder, 2007 #3) | 2007 | 61 | 13.5 |
| Batirel[21](#_ENREF_21" \o "Batirel, 2008 #4) | 2008 | 20 | 10 |
| Bolukbas[22](#_ENREF_22" \o "Bolukbas, 2011 #5) | 2009 | 35 | 15.8 |
| Krug[23](#_ENREF_23) | 2009 | 77 | 10.1 |
| Van Schil[24](#_ENREF_24" \o "Van Schil, 2010 #6) | 2009 | 59 | 13.9 |
| Hasani[25](#_ENREF_25) | 2009 | 36 | 12.5 |
